# Supplementary material for: Tracking mesenchymal stem cell tumor-homing using fluorescent silica nanoparticles
Source: Royal Society of Chemistry journal article supplement (doi:10.1039/c4tb01452a), 2014-12-11
Supplement: c4tb01452a1.pdf [file c4tb01452a1.pdf]

## Tracking mesenchymal stem cell tumor-homing using fluorescent silica nanoparticles

Yu Gao<sup>a</sup>, Yaqi Wang<sup>b</sup>, Afu Fu<sup>a</sup>, Wei Shi<sup>a</sup>, David Yeo<sup>a</sup>, Kathy Qian Luo<sup>a</sup>, Hooisweng Ow<sup>b,c</sup>,  
Chenjie Xu<sup>a\*</sup>

<sup>a</sup> Division of Bioengineering, School of Chemical and Biomedical Engineering, Nanyang Technological University, Singapore 637457

<sup>b</sup> Hybrid Silica Technologies, Cambridge, MA, USA 02139

<sup>c</sup> Aramco Research Center, Boston, MA, USA

\*Correspondence should be addressed to CJ Xu (cjxu@ntu.edu.sg)

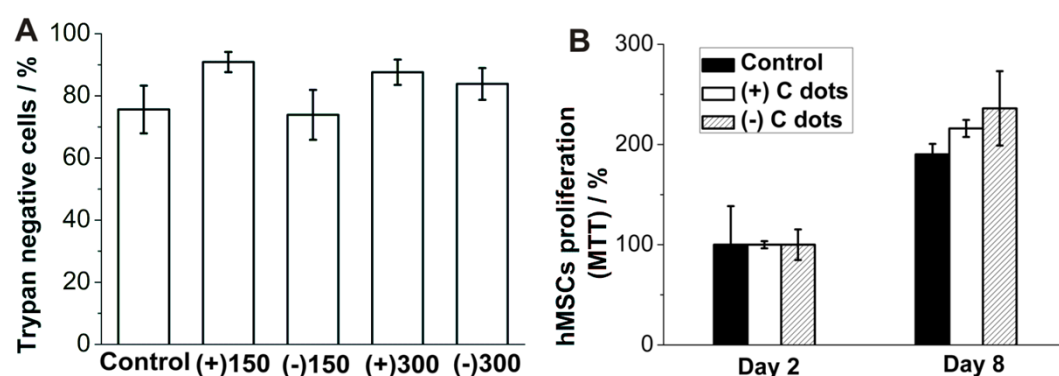

**SI Figure 1.** (A) Viability of hMSCs when incubated with 0 (control), 150 µg/mL, 300 µg/mL of C-dots with both positive (+) and negative (-) charges for 24 hours. (B) Proliferation of hMSCs labeled with 150 µg of (+) and (-) C-dots at day 2 and 8.

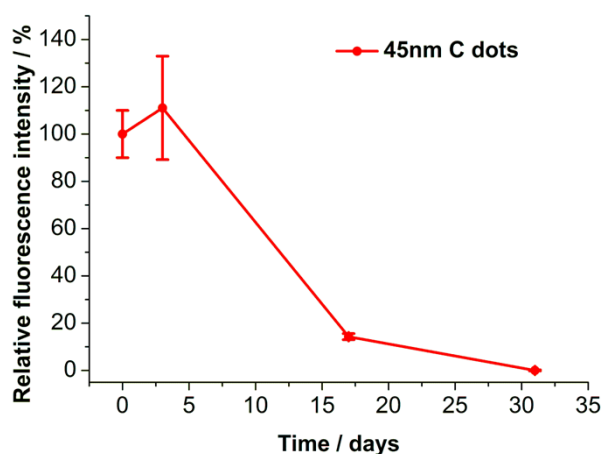

**SI Figure 2.** The change in the fluorescence intensity of 45 nm C dots labeled hMSCs.

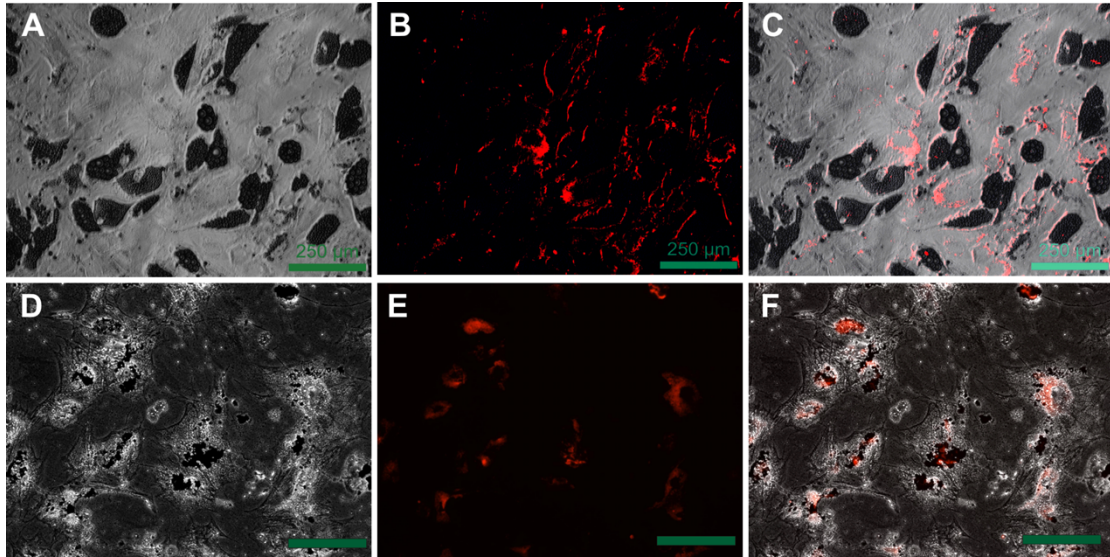

**SI Figure 3.** Images of C dots labeled hMSCs under differentiation: (A-C) Bright field, fluorescence, and merged images of hMSCs in the adipogenic differentiation at day 23; (D-F) Bright field, fluorescence, and merged images of hMSCs in the osteogenic differentiation at day 17. Scale bars are 250  $\mu\text{m}$ .

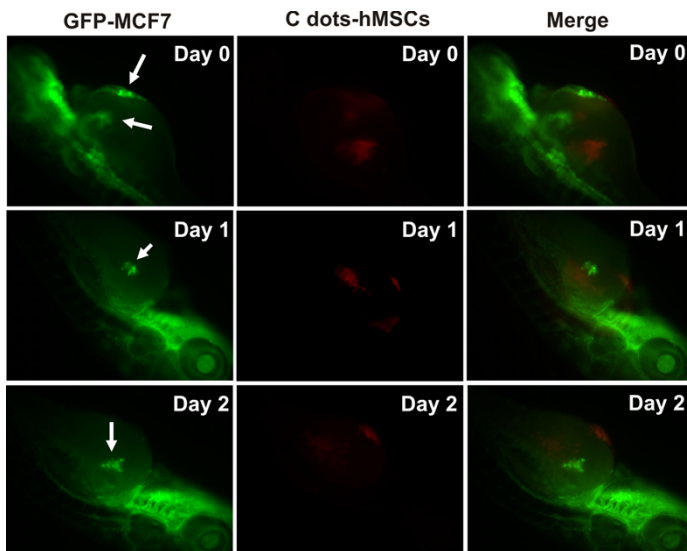

**SI Figure 4.** Fluorescence images of C dots labeled hMSCs in a fli:EGFP transgenic zebrafish. GFP-MCF7 cells and C dots labeled hMSCs were injected one after another at the same location (perivitelline space) of a three-day-old zebrafish larva. Green color represents the GFP-MCF-7 cells (indicated by white arrows) and the fluorescence of the blood vessels. Red color represents C dots labeled hMSCs. Images were taken at day 0, 1, and 2 after injection.
